# Supplementary material
Source: PubMed Central journal article supplement (PMC6310232)

edge

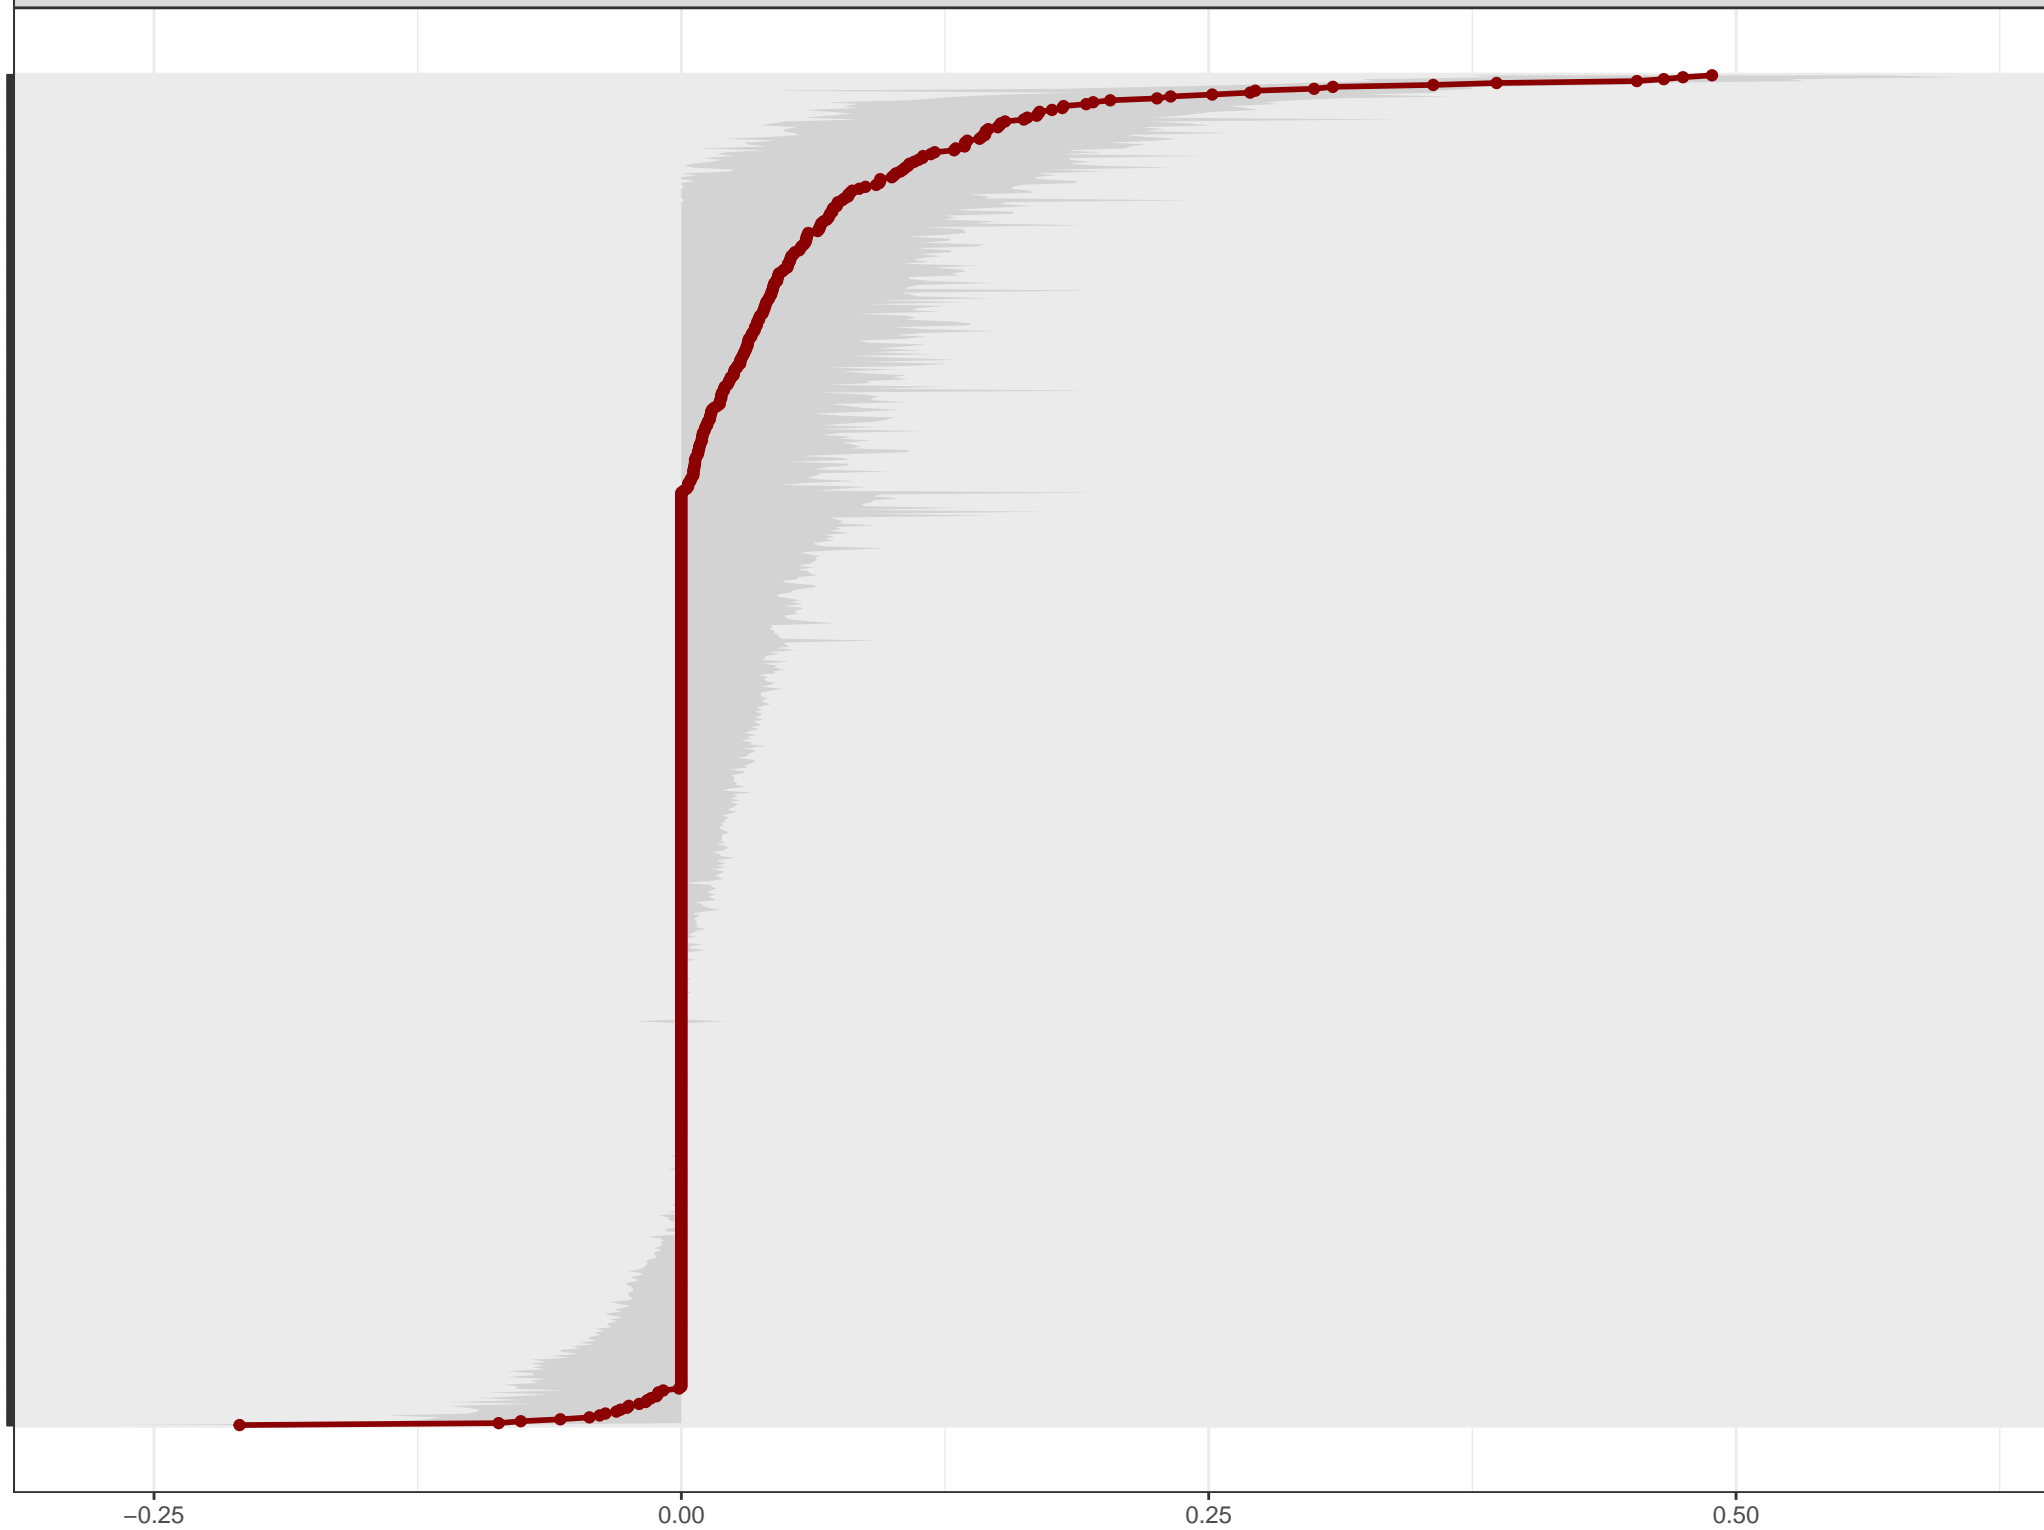

Supplement: NIHMS975755-supplement-4.pdf [file NIHMS975755-supplement-4.pdf]

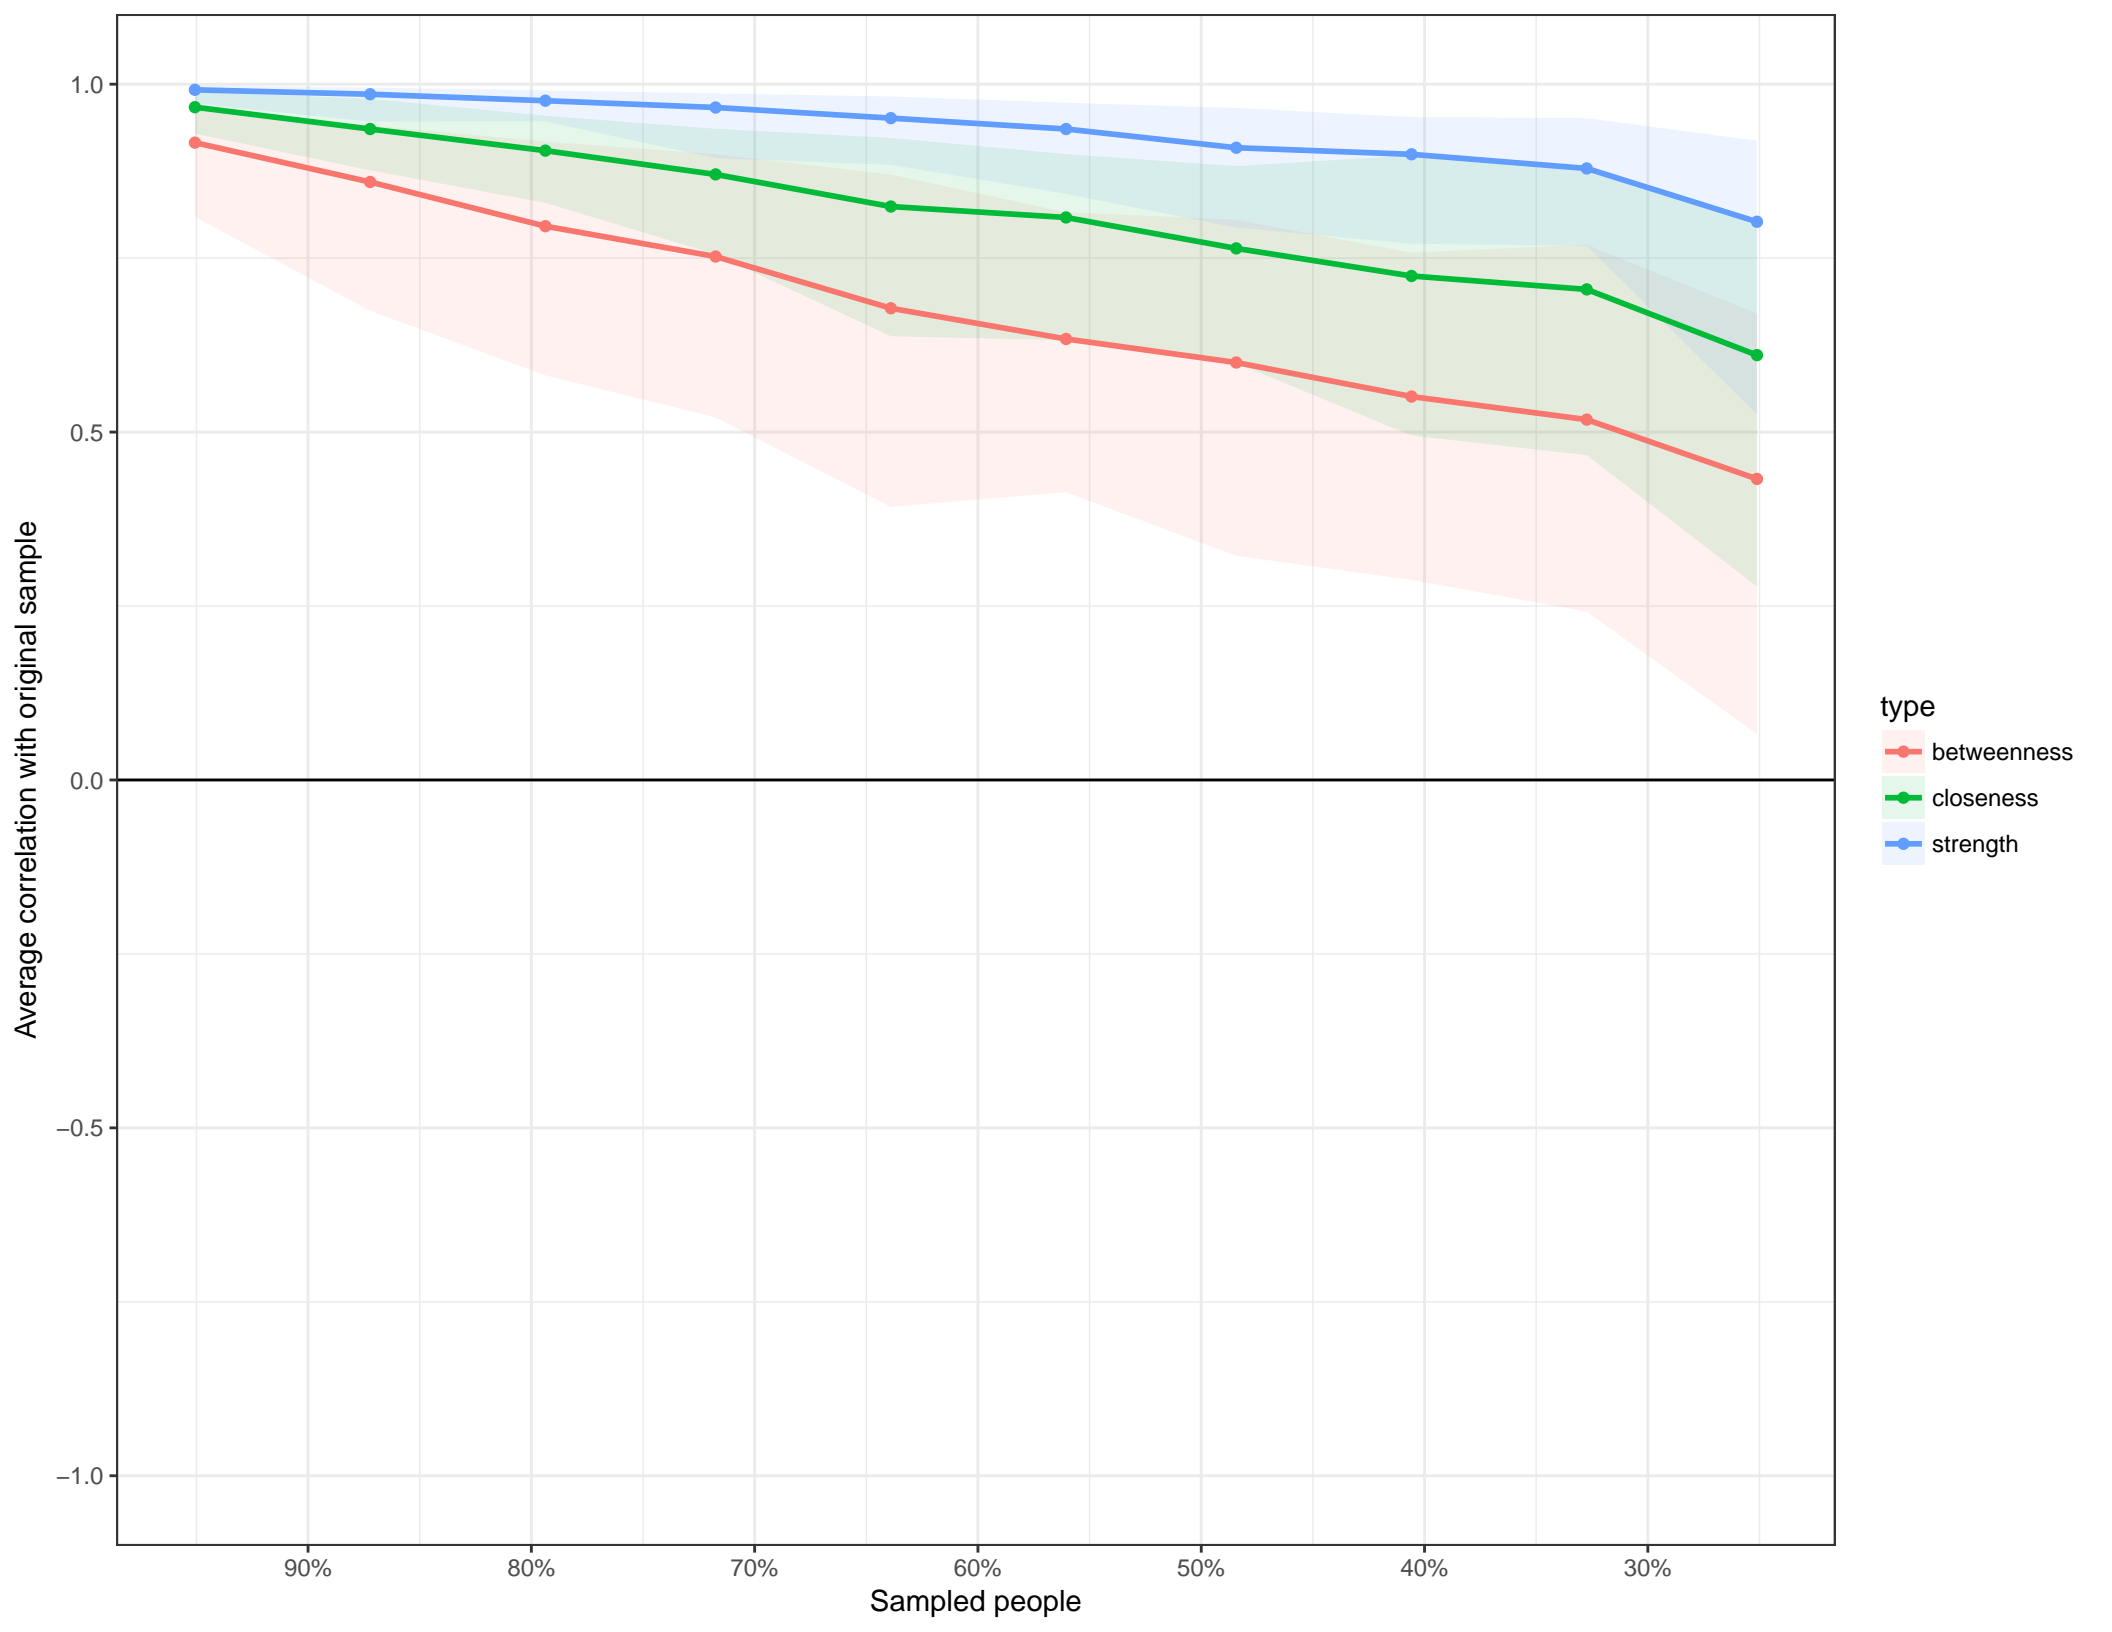

Supplement: NIHMS975755-supplement-5.pdf [file NIHMS975755-supplement-5.pdf]
